## Prognostic significance of cardiac injury in COVID-19 patients with and without coronary artery disease

H. Barman<sup>1</sup>, A. Atici<sup>2</sup>, H.O. Arabaci<sup>1</sup>, I. Sahin<sup>3</sup>, B. Gungor<sup>4</sup>, S.M. Dogan<sup>1</sup>

<sup>1</sup>Istanbul University-Cerrahpasa Institute of Cardiology, Istanbul, Turkey; <sup>2</sup>Medeniyet University, Cardiology, Istanbul, Turkey; <sup>3</sup>Bagcilar Training and Research Hospital, Istanbul, Turkey; <sup>4</sup>Dr. Siyami Ersek Thoracic and Cardiovascular Surgery Center, Istanbul, Turkey

**Funding Acknowledgement:** Type of funding sources: None.

**Objective:** COVID-19 is a disease with high mortality, and risk factors for worse clinical outcome have not been well-defined yet. The aim of this study is to delineate the prognostic importance of presence of concomitant cardiac injury on admission in patients with COVID-19.

**Methods:** For this multi-center retrospective study, data of consecutive patients who were treated for COVID-19 between March 20 - April 20 2020 were collected. Clinical characteristics, laboratory findings and outcomes data were obtained from electronic medical records. In-hospital clinical outcome was compared between patients with and without cardiac injury.

**Results:** A total of 607 hospitalized patients with COVID-19 were included in the study; the median age was 62.5±14.3 years, and 334 (55%) were male. Cardiac injury was detected in 150 (24.7%) of patients included in the study. Mortality rate was higher in patients with cardiac injury (42%

vs. 8%;  $p<0.01$ ). The frequency of patients who required intensive care unit (ICU) (72% vs.19%), who developed acute kidney injury (AKI) (14% vs. 1%) and acute respiratory distress syndrome (ARDS) (71% vs. 18%) were also higher in patients with cardiac injury. In multivariate analysis, age, coronary artery disease (CAD), elevated CRP levels, and presence of cardiac injury (OR: 10.58, 95% CI: 2.42–46.27;  $p<0.001$ ) were found to be independent predictors of mortality. In subgroup analysis, including patients free of history of CAD, presence of cardiac injury on admission also predicted mortality (OR: 2.52, 95% CI: 1.17–5.45;  $p=0.018$ ).

**Conclusion:** Cardiac injury on admission is associated with worse clinical outcome and higher mortality risk in COVID-19 patients including patients free of previous CAD diagnosis.
